# Supplementary material
Source: PubMed Central journal article supplement (PMC2661404)
Supplement: M803223200_1.pdf [file M803223200_1.pdf]

## Supplemental material

**Table S1.** Sequence of the oligonucleotides used to introduce the mutations in the *ponB* gene and names of the constructed plasmids.

| Mutations | Primers sequences 5' -> 3'                                               | Plasmids  |
|-----------|--------------------------------------------------------------------------|-----------|
| F237A     | GAAGACCGTCATGCGTACGAGCATGATGG<br>CCATCATGCTCGTACGCATGACGGTCTTC           | pDML924-G |
| H240Q     | GTCATTTTTACGAGCAAGATGGAATCAGTCTC<br>GAGACTGATTCCATCTTGCTCGTAAAAATGAC     | pDML924-O |
| G242A     | TTTTACGAGCATGATGCGATCAGTCTCTACTC<br>GAGTAGAGACTGATCGCATCATGCTCGTAAAA     | pDML924-P |
| G264L     | CGCACGGTACAGCTGGCGAGTACGCTGAC<br>GTCAGCGTACTCGCCAGCTGTACCGTGCG           | pDML924-M |
| S266A     | GGTACAGGGTGCGGCGACGCTGACGCAACAG<br>CTGTTGCGTCAGCGTCGCCCGCACCCCTGTACC     | pDML924-Q |
| T267A     | CAGGGTGCGAGTGCGCTGACGCAACAGCTGG<br>CCAGCTGTTGCGTCAGCGCACTCGCACCCCTG      | pDML924-H |
| Q271A     | ACGCTGACGCAAGCGCTGGTGAAAAACC<br>GGTTTTTCACCAGCGCTTGCCTCAGCGT             | pDML924-I |
| K274A     | GCAACAGCTGGTGGCGAACCTGTTCTCTCC<br>GGAGAGGAACAGGTTCCGCCACCAGCTGTTGC       | pDML924-R |
| R286A     | CGTTCCTTACTGGGCGAAAGCGAACGAAGC<br>GCTTCGTTTCGCTTTCGCCAGTAAGAACG          | pDML924-J |
| K287A     | TCTTACTGGCGTGCTGCGAACGAAGCTTAC<br>GTAAGCTTCGTTTCGCAGCACGCCAGTAAGA        | pDML924-E |
| K303A     | GCGCGTTACAGCGCTGACCGTATTCTTGAG<br>CTCAAGAATACGGTCAGCGCTGTAACGCGC         | pDML924-F |
| N312A     | CTTGAGCTGTATATGGCGGAGGTGTATCTCGGTC<br>GACCGAGATACACCTCCGCCATATACAGCTCAAG | pDML924-K |
| R372A     | CTGGCGCTGGAGGCGCGTAATCTGGTGCTG<br>CAGCACCAGATTACGCGCCTCCAGCGCCAG         | pDML924-L |
| L377G     | CGTAATCTGGTGGGTCGCTGCTGCAACAG<br>CTGTTGCAGCAGACGACCCACCAGATTACG          | pDML924-N |
